# Supplementary material
Source: bioRxiv or medRxiv preprint supplement (https://www.biorxiv.org/content/biorxiv/early/2019/08/05/724641.1/DC1/embed/media-1.pdf)

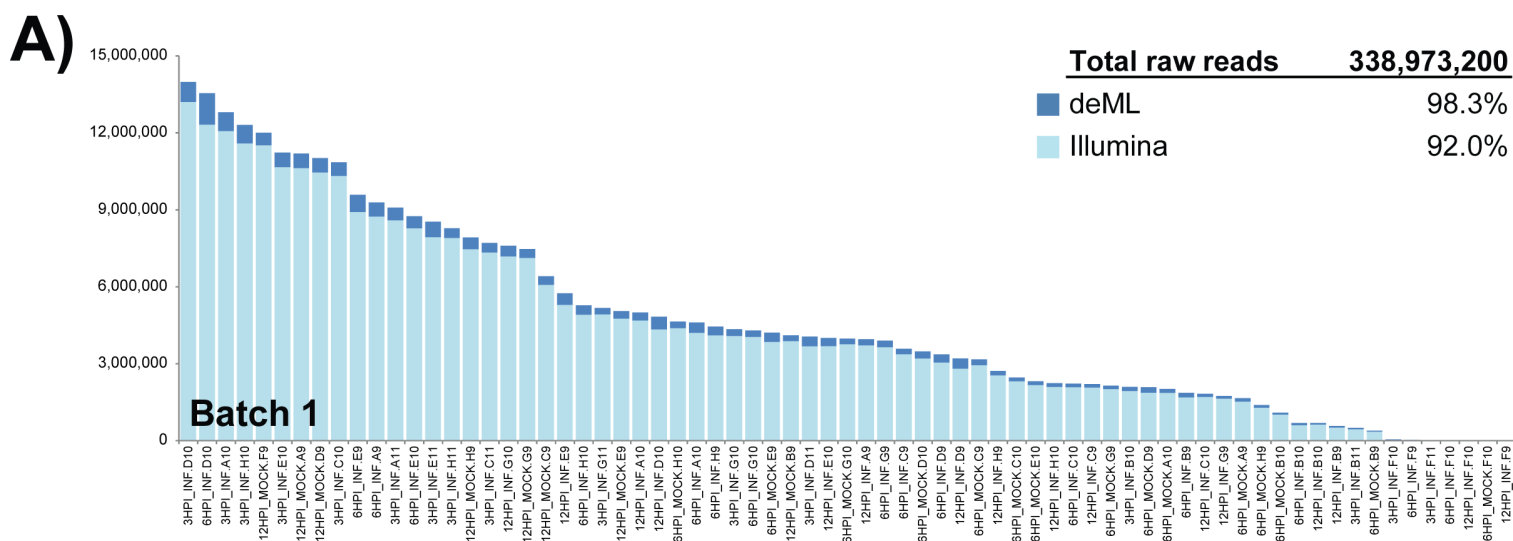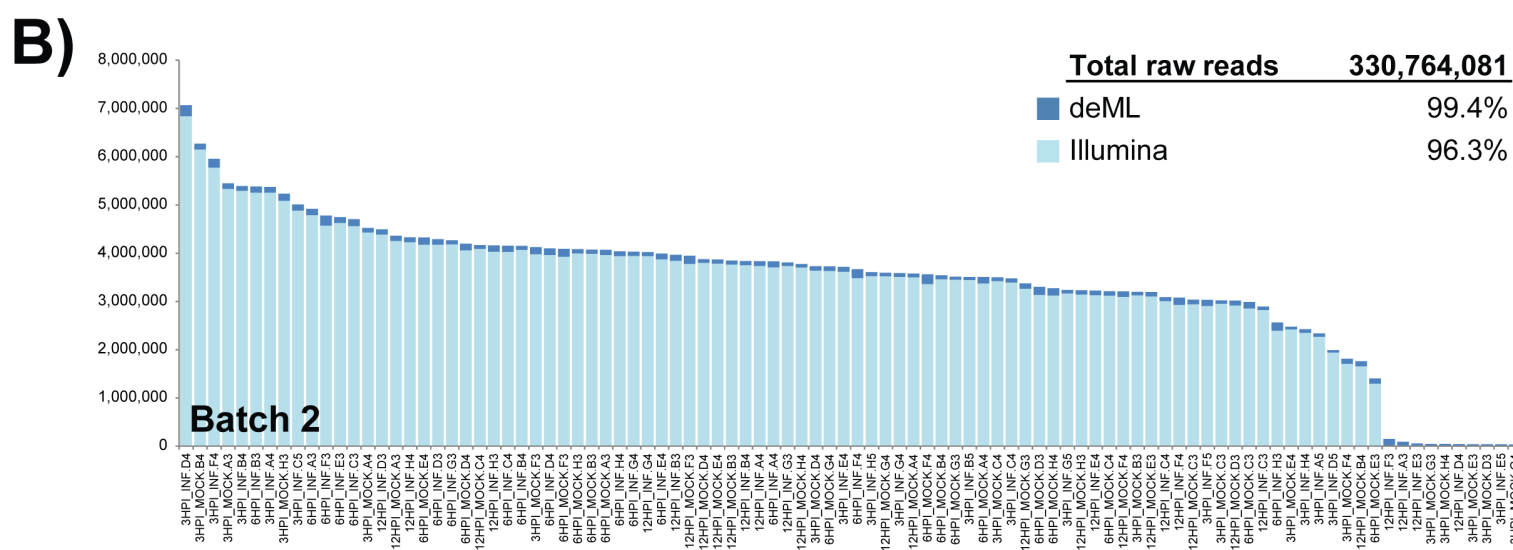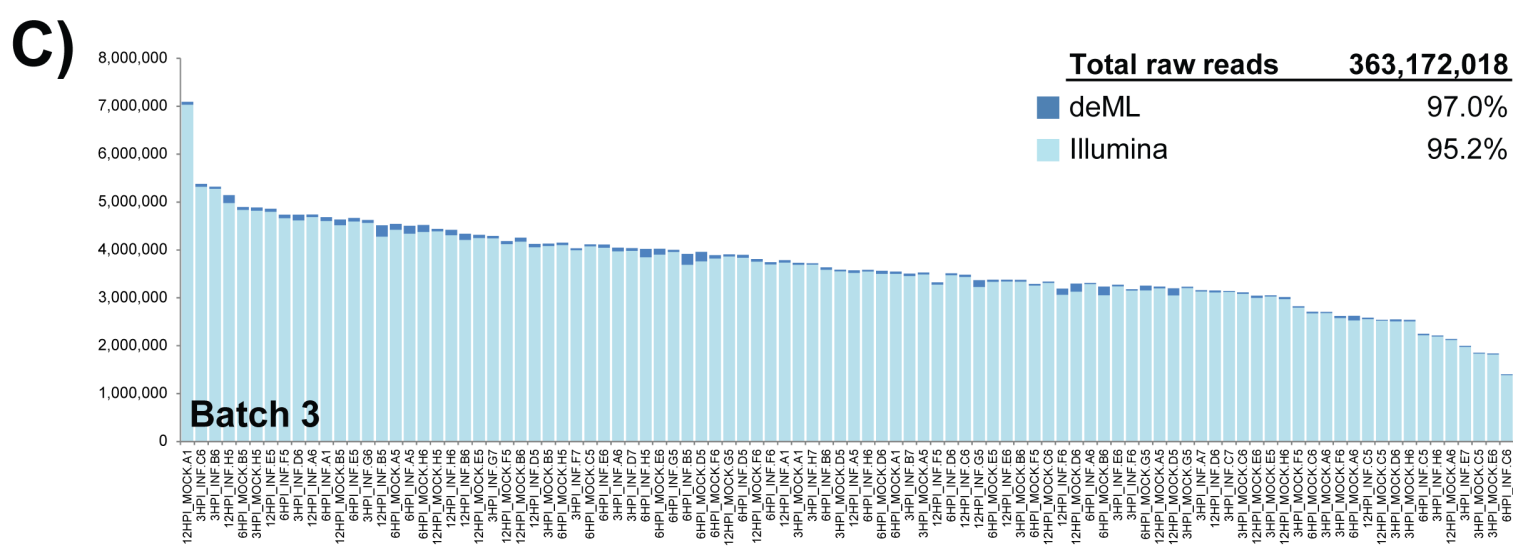

### A) Genetic biotypes

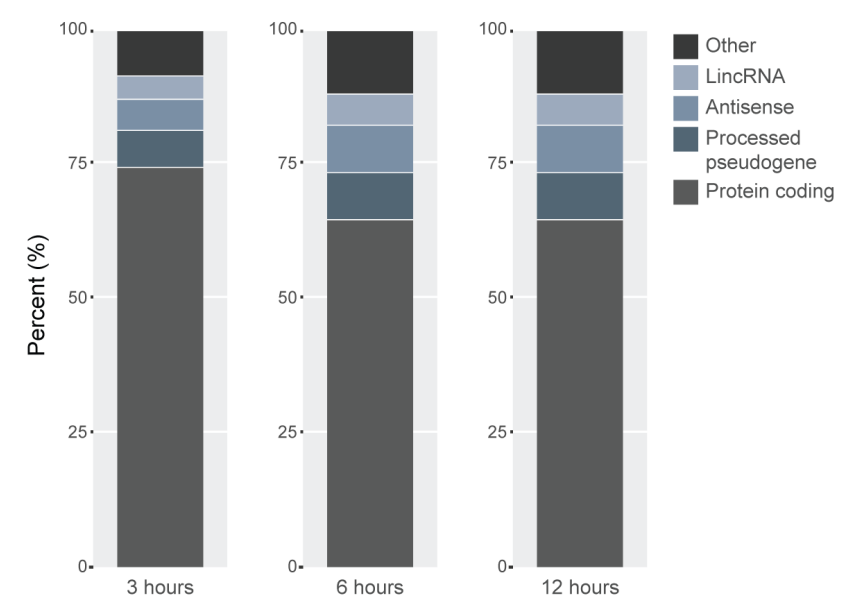

### B) Expression from gene biotypes

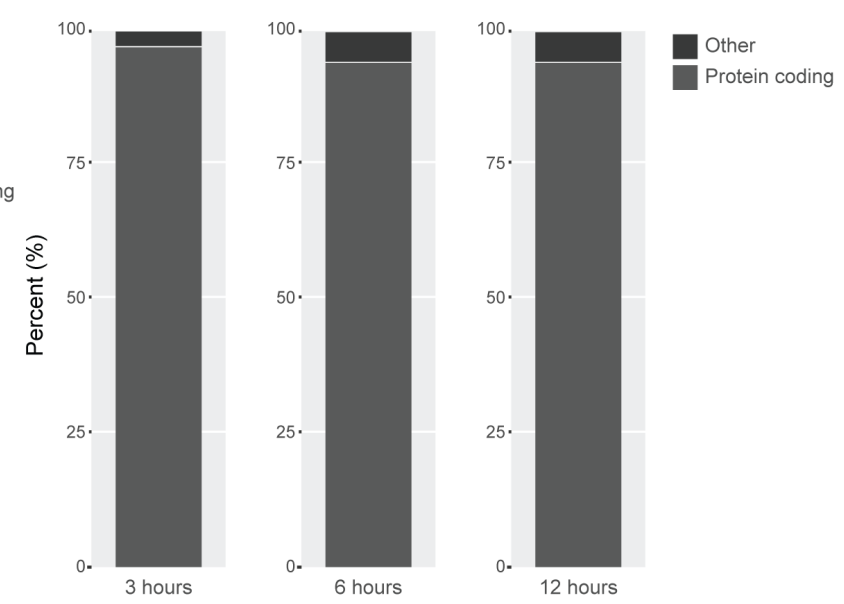

### C) Expression from each chromosome

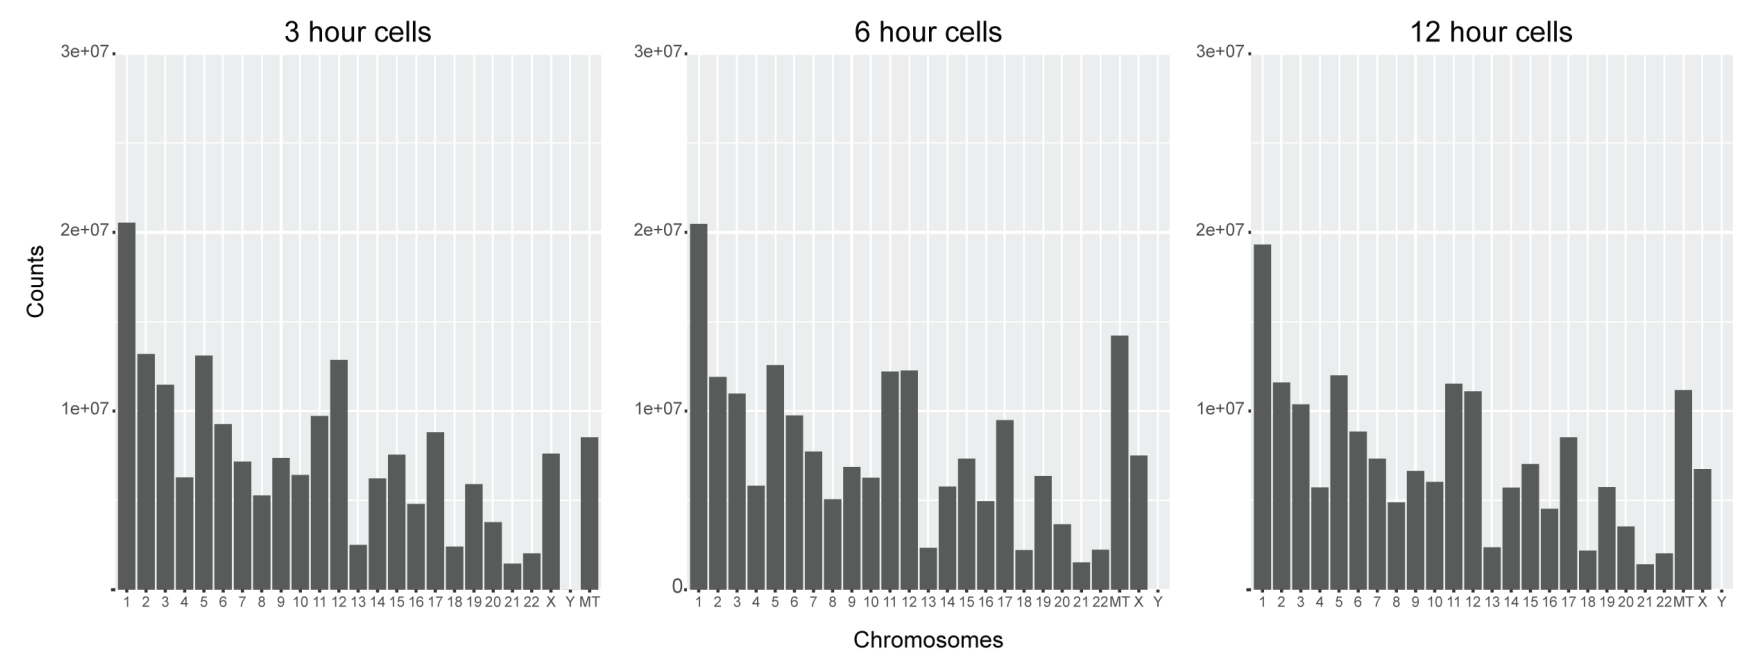

Supplemental Figure 3

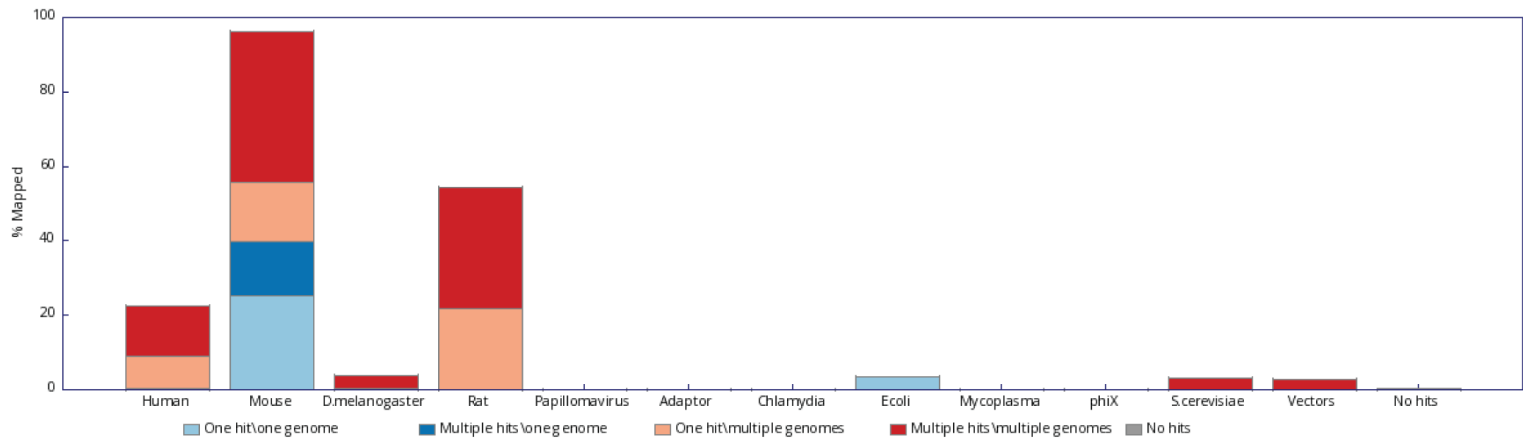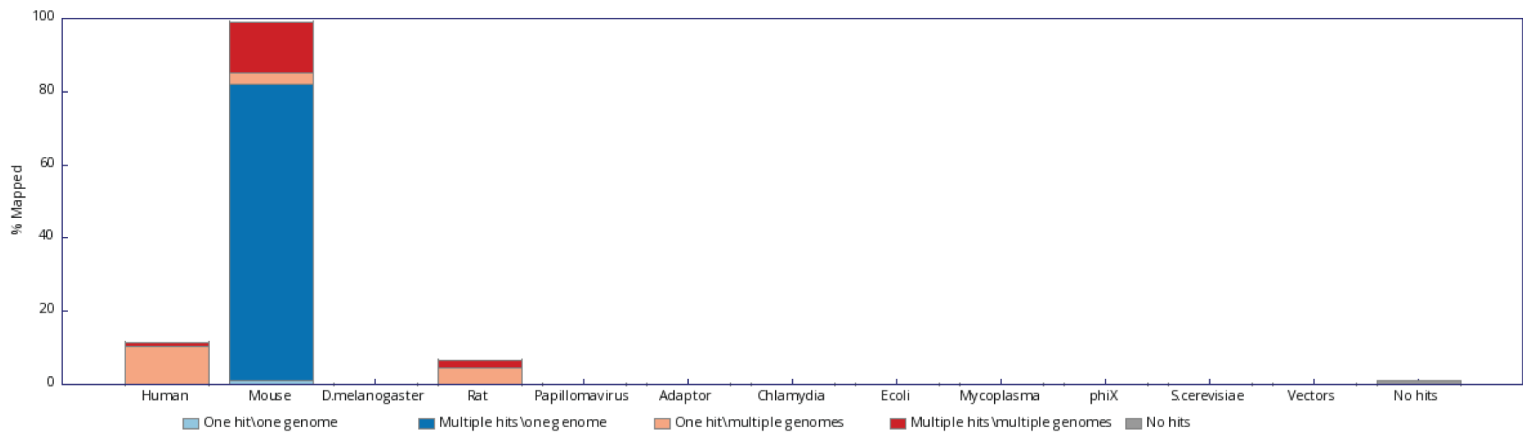

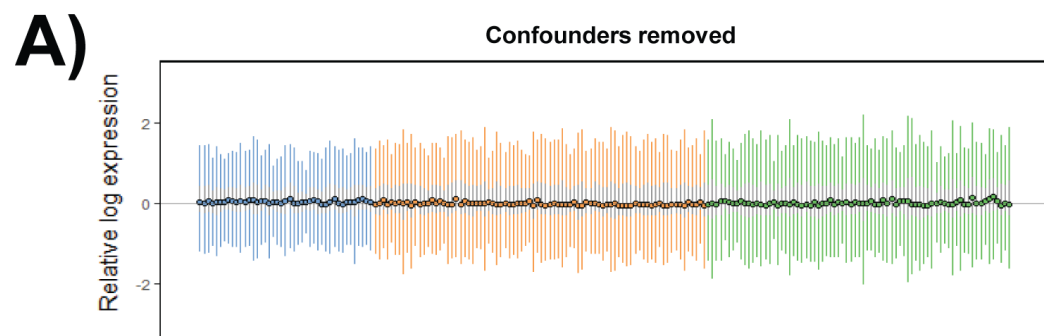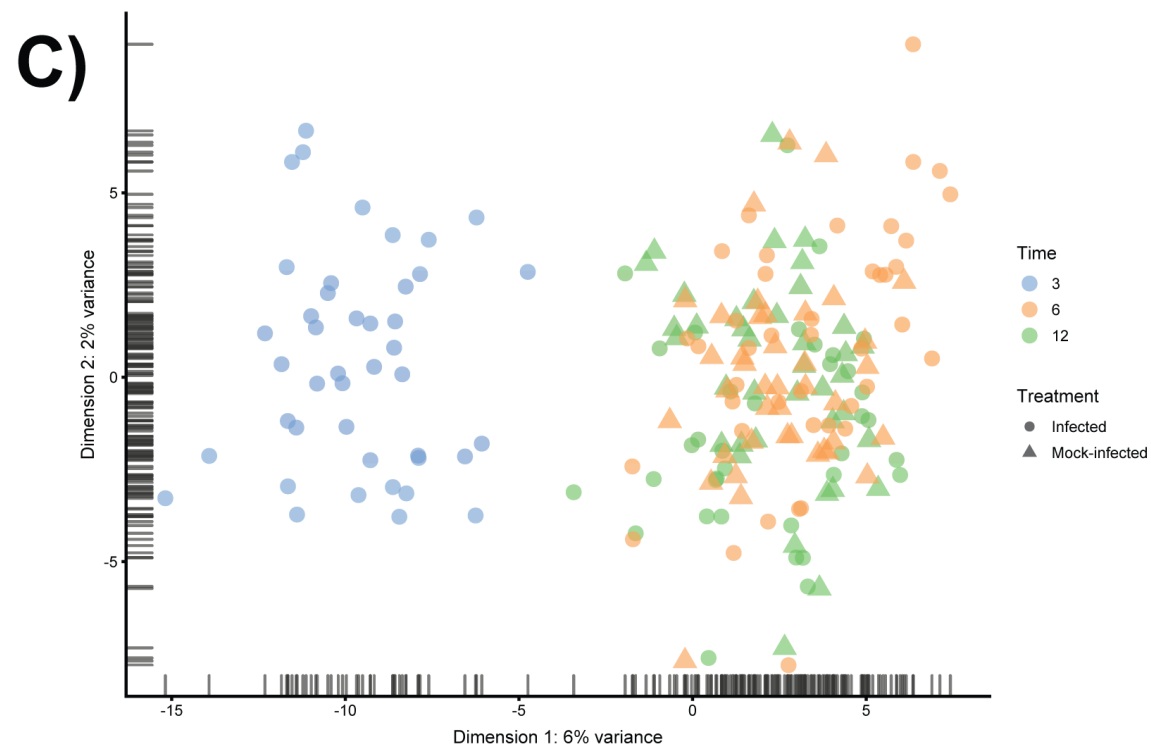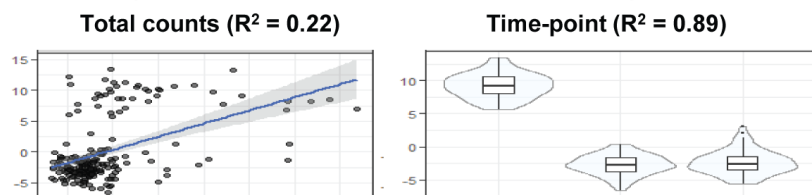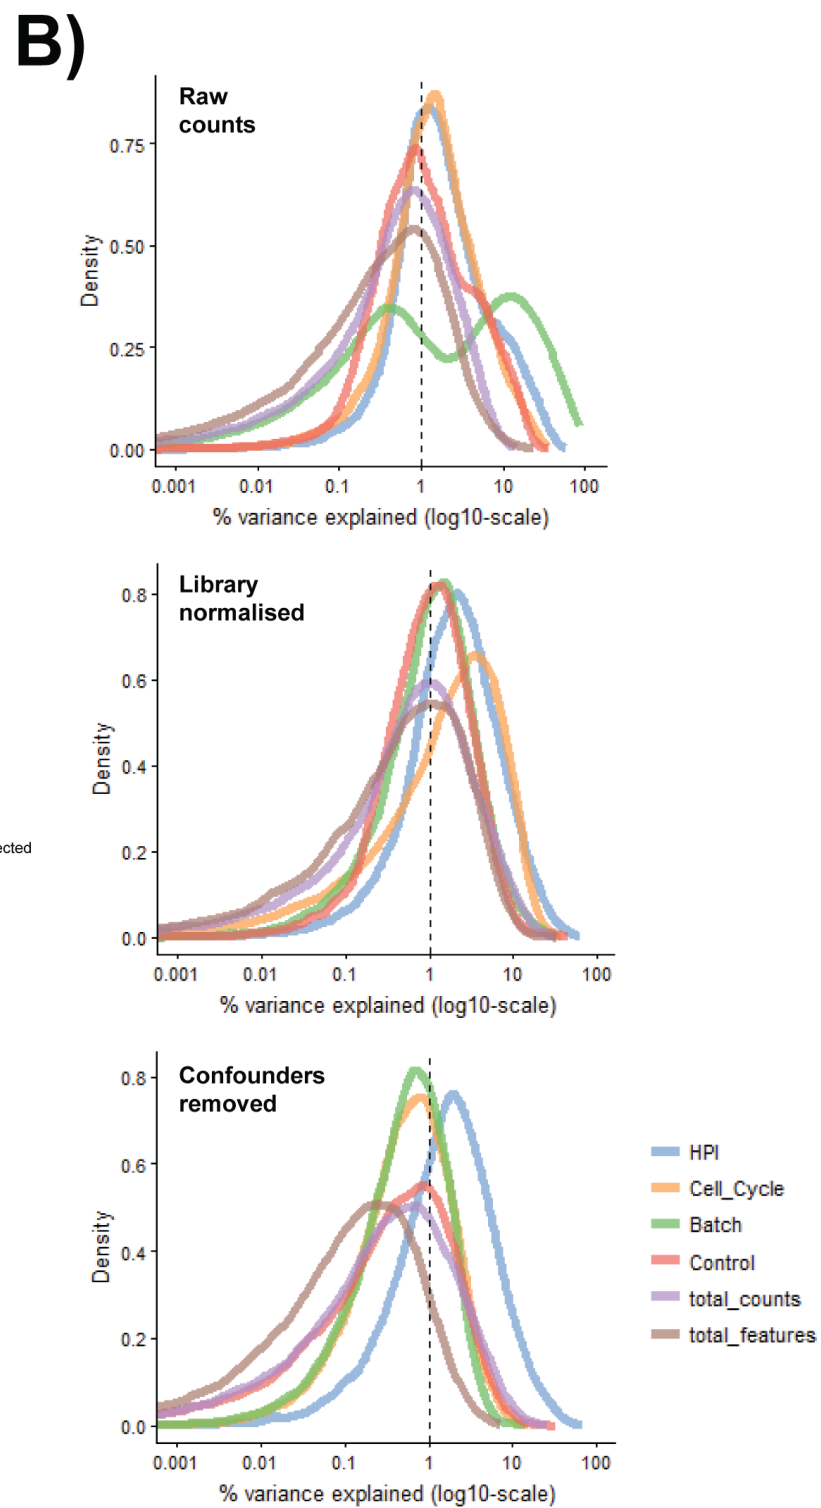

A)

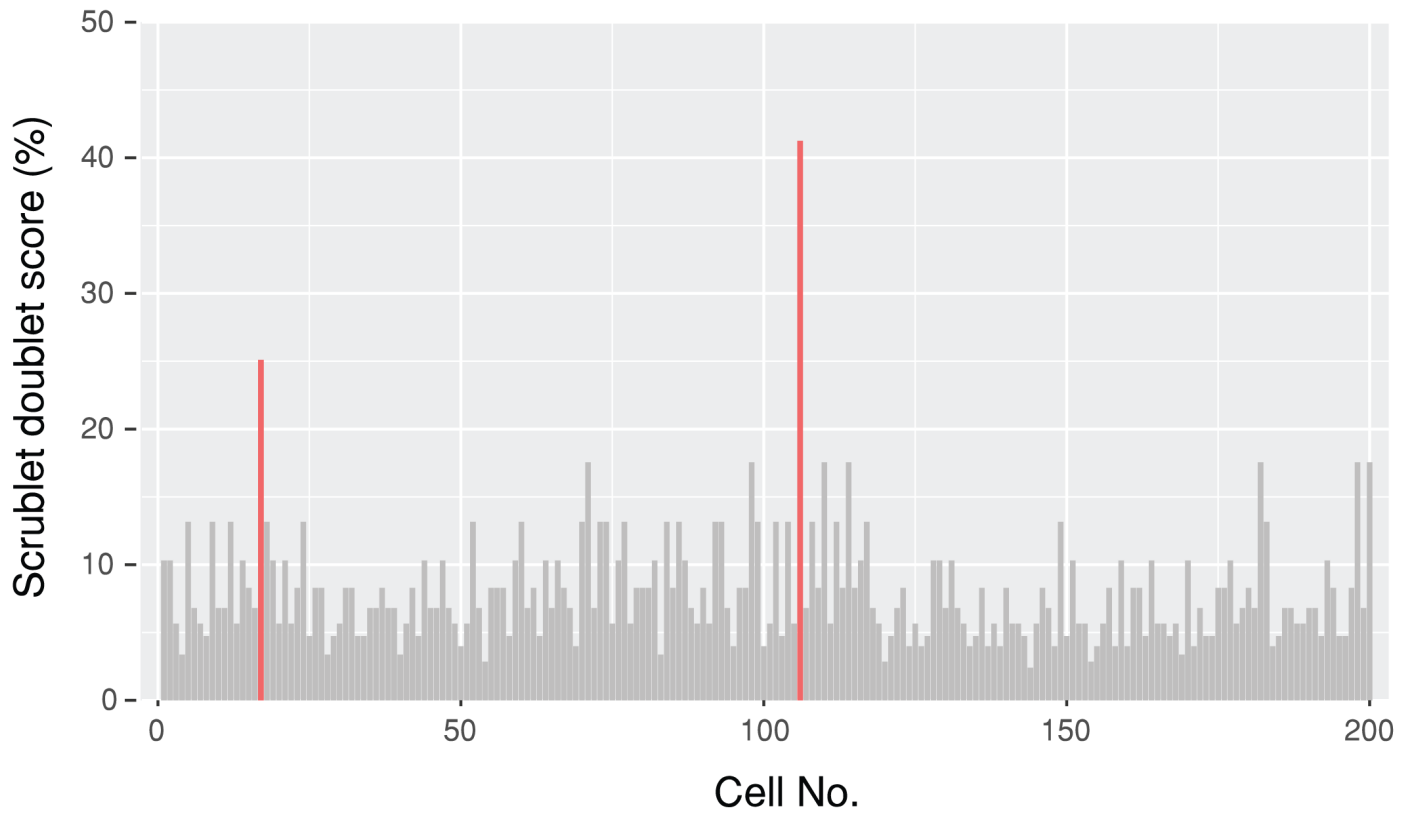

B)

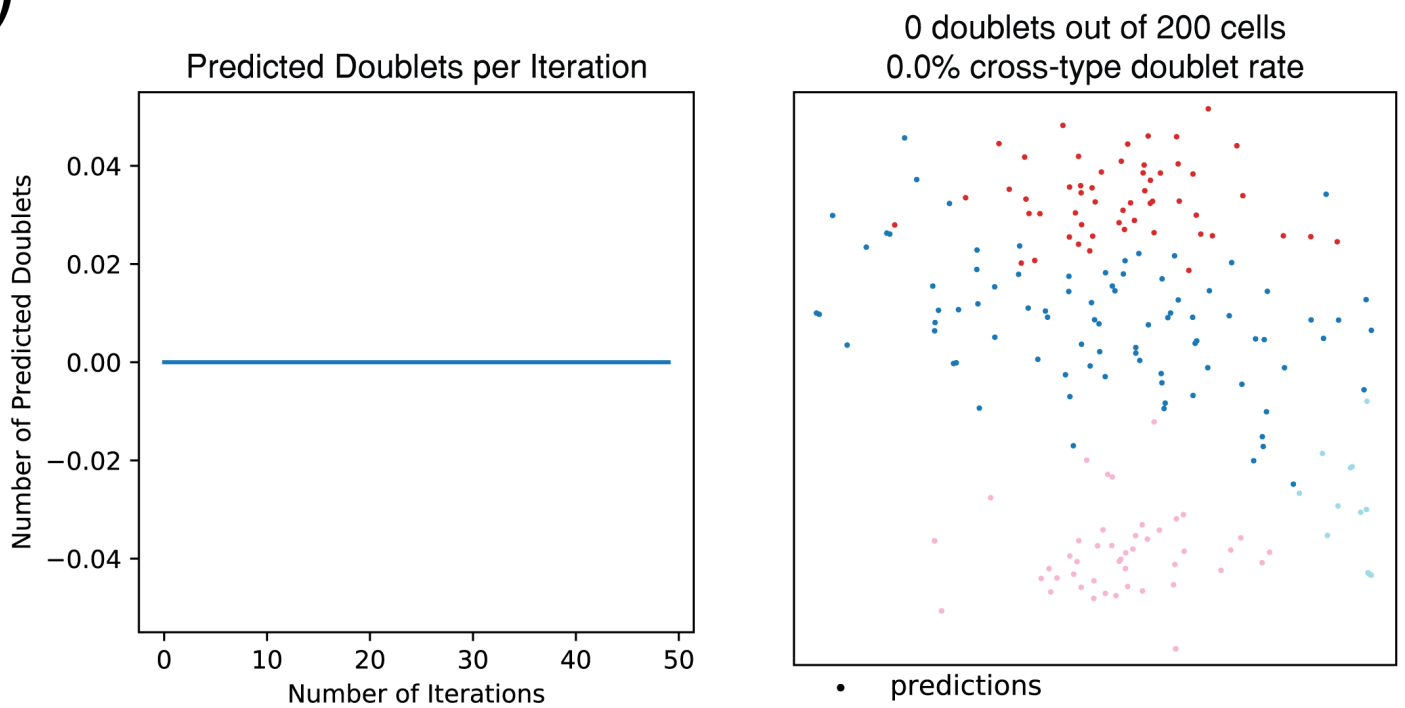

A)

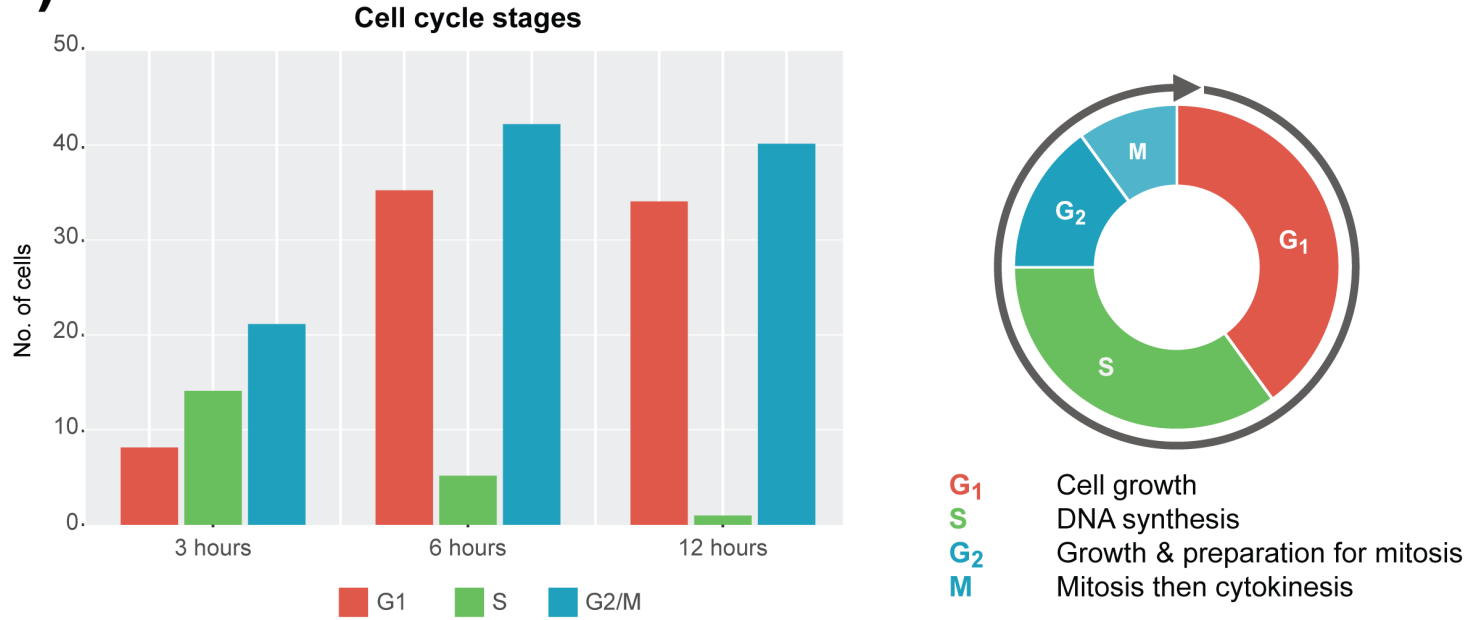

B)

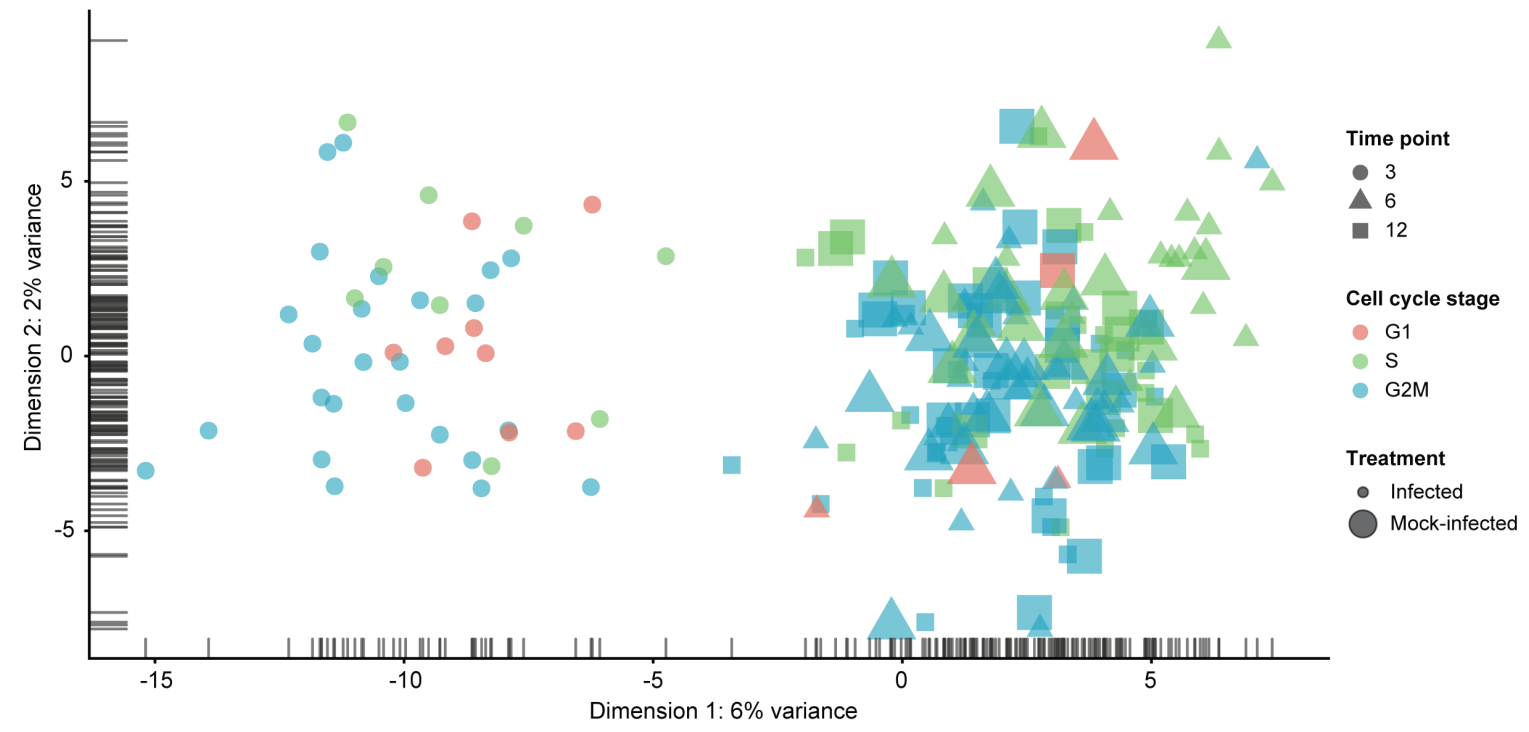

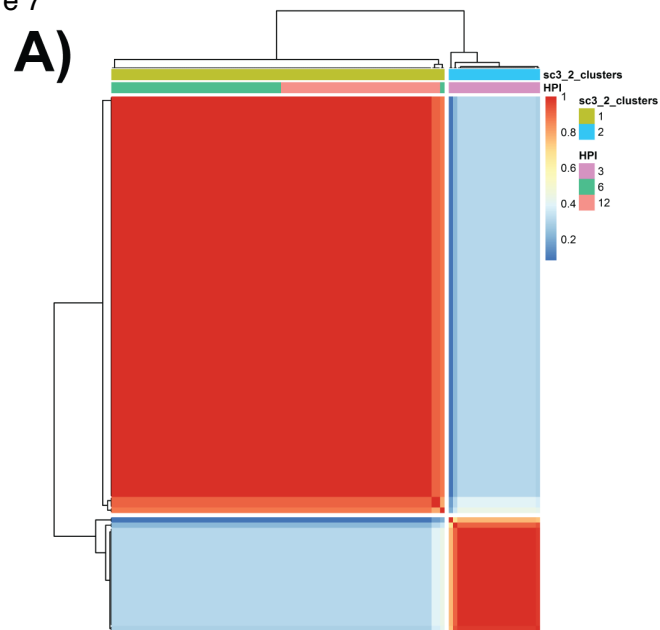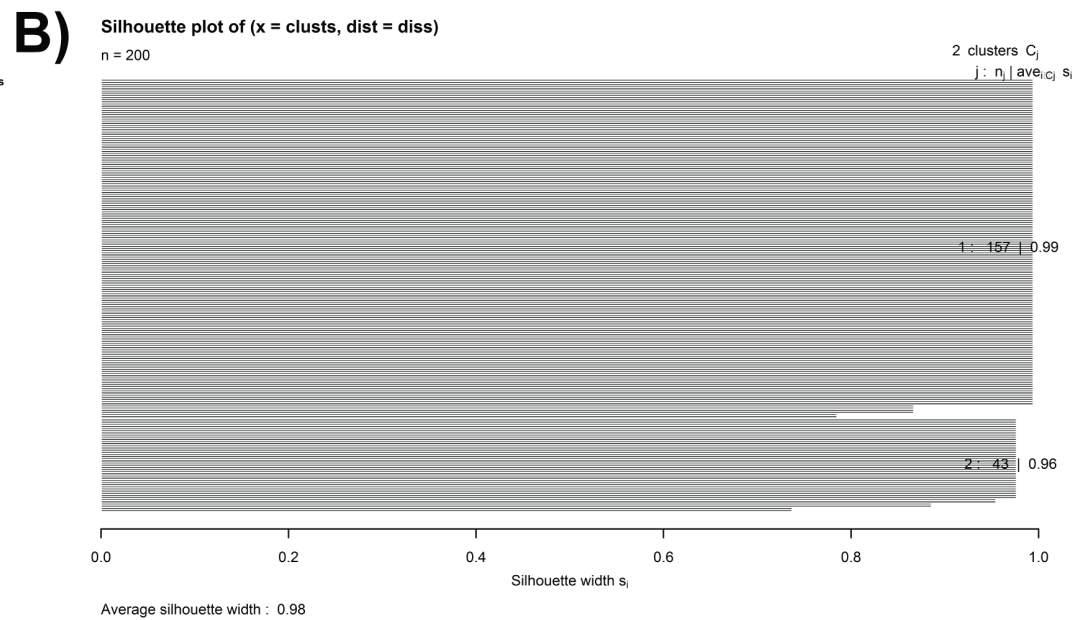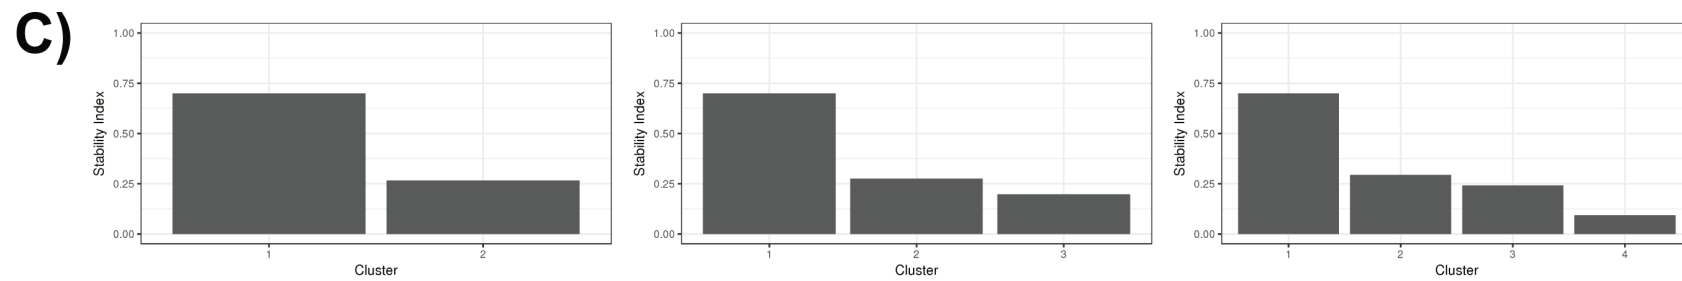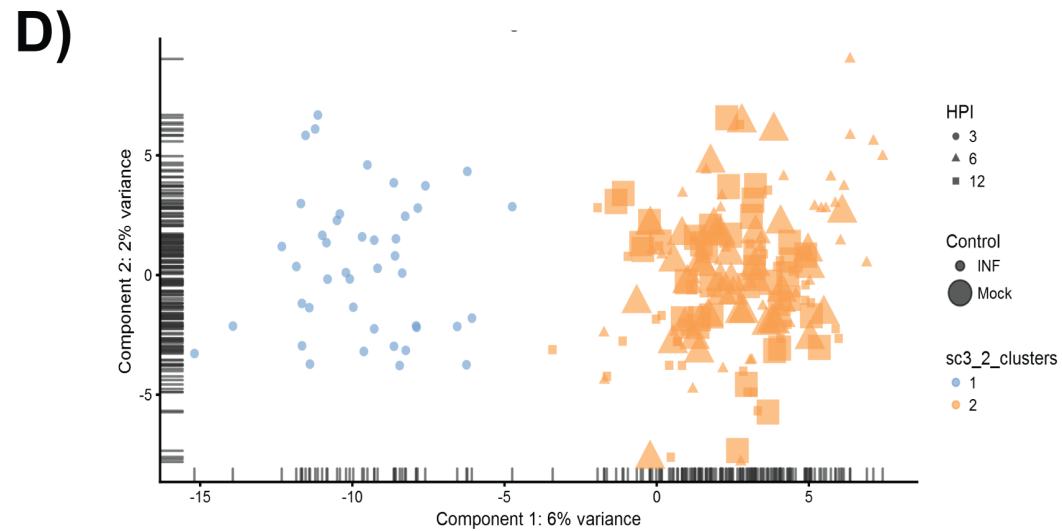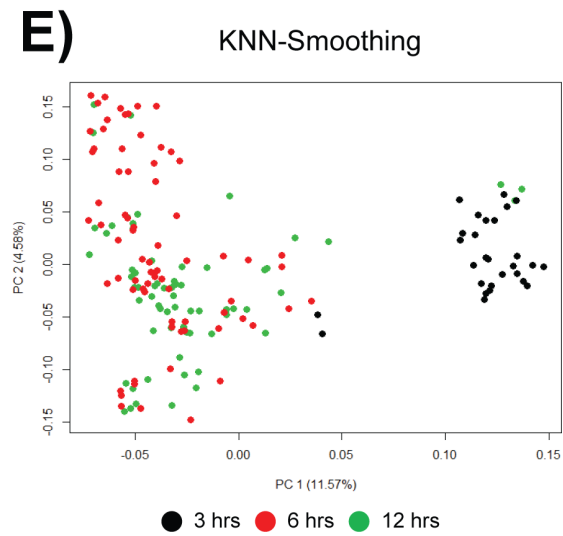

**A)**

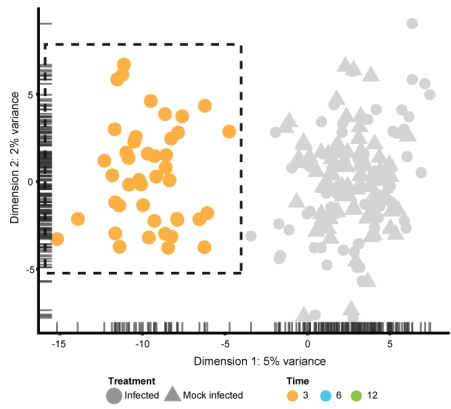

2 clusters

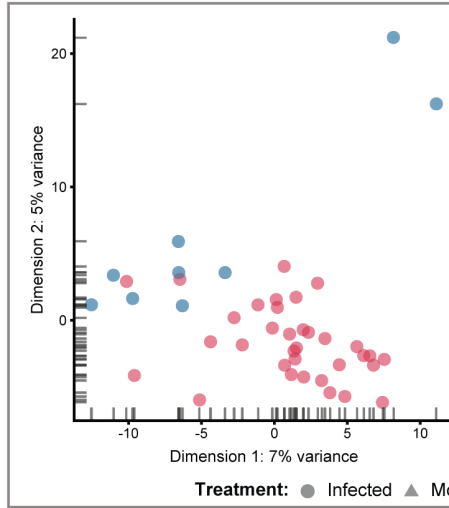

3 clusters

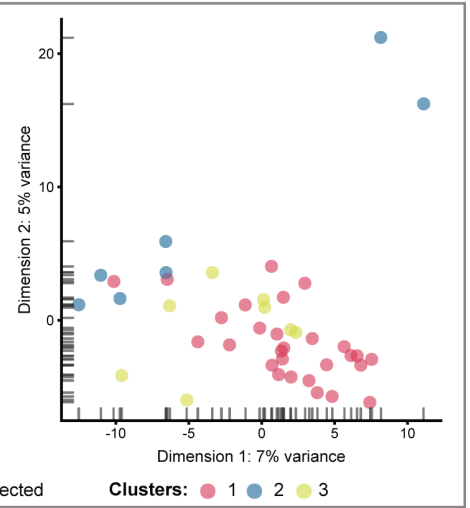

**B)**

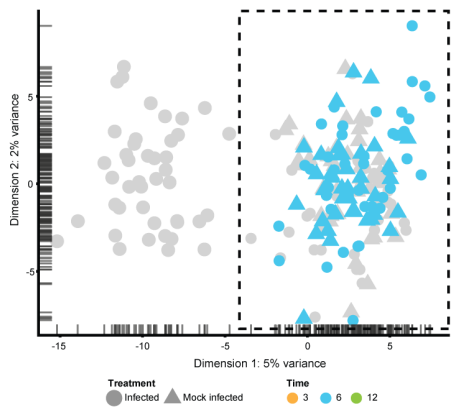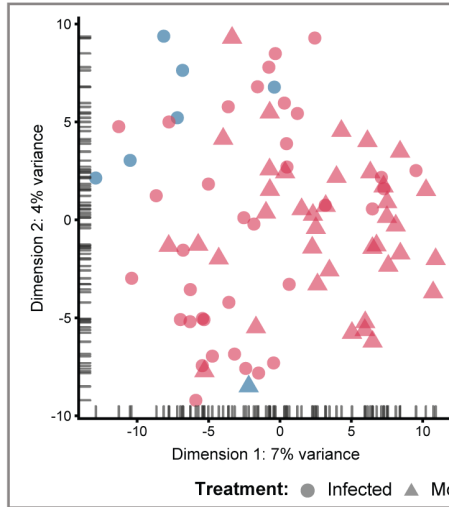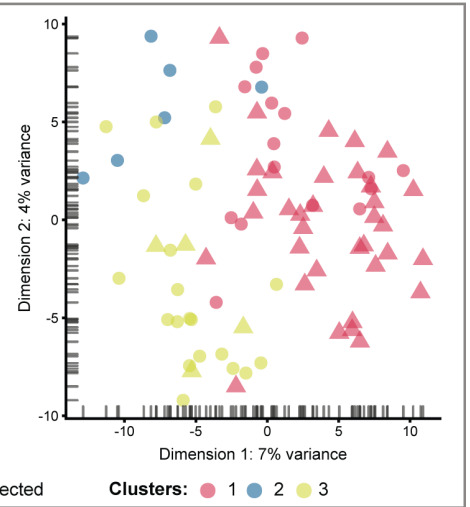

**C)**

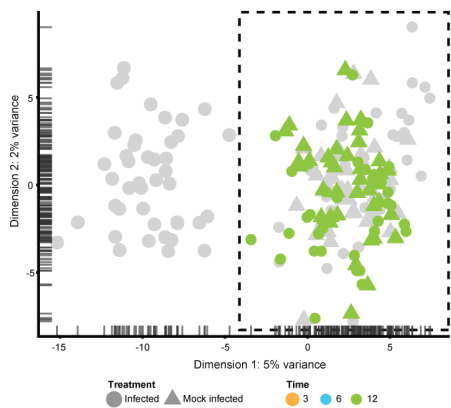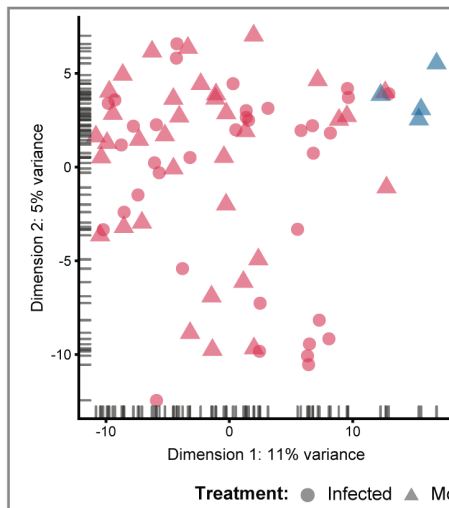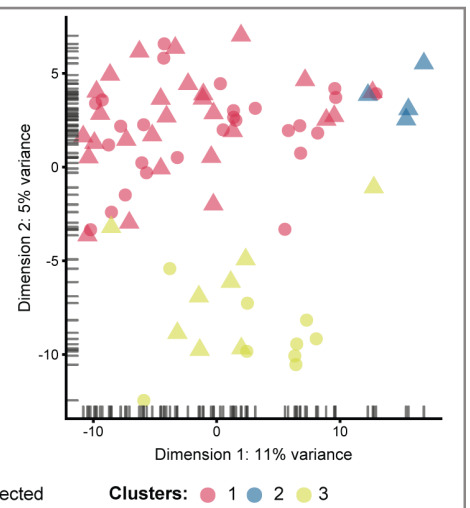

**D)**

2 clusters

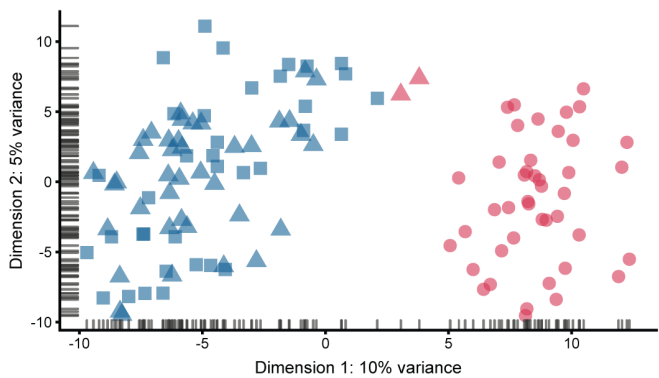

3 clusters

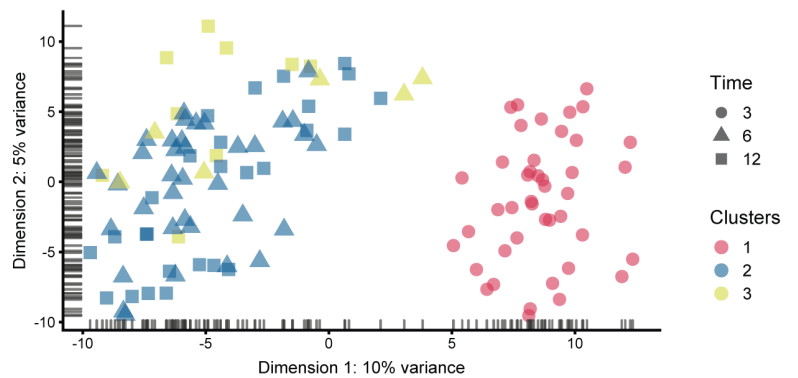

Time  
 ● 3  
 ▲ 6  
 ■ 12  
 Clusters  
 ● 1  
 ● 2  
 ● 3



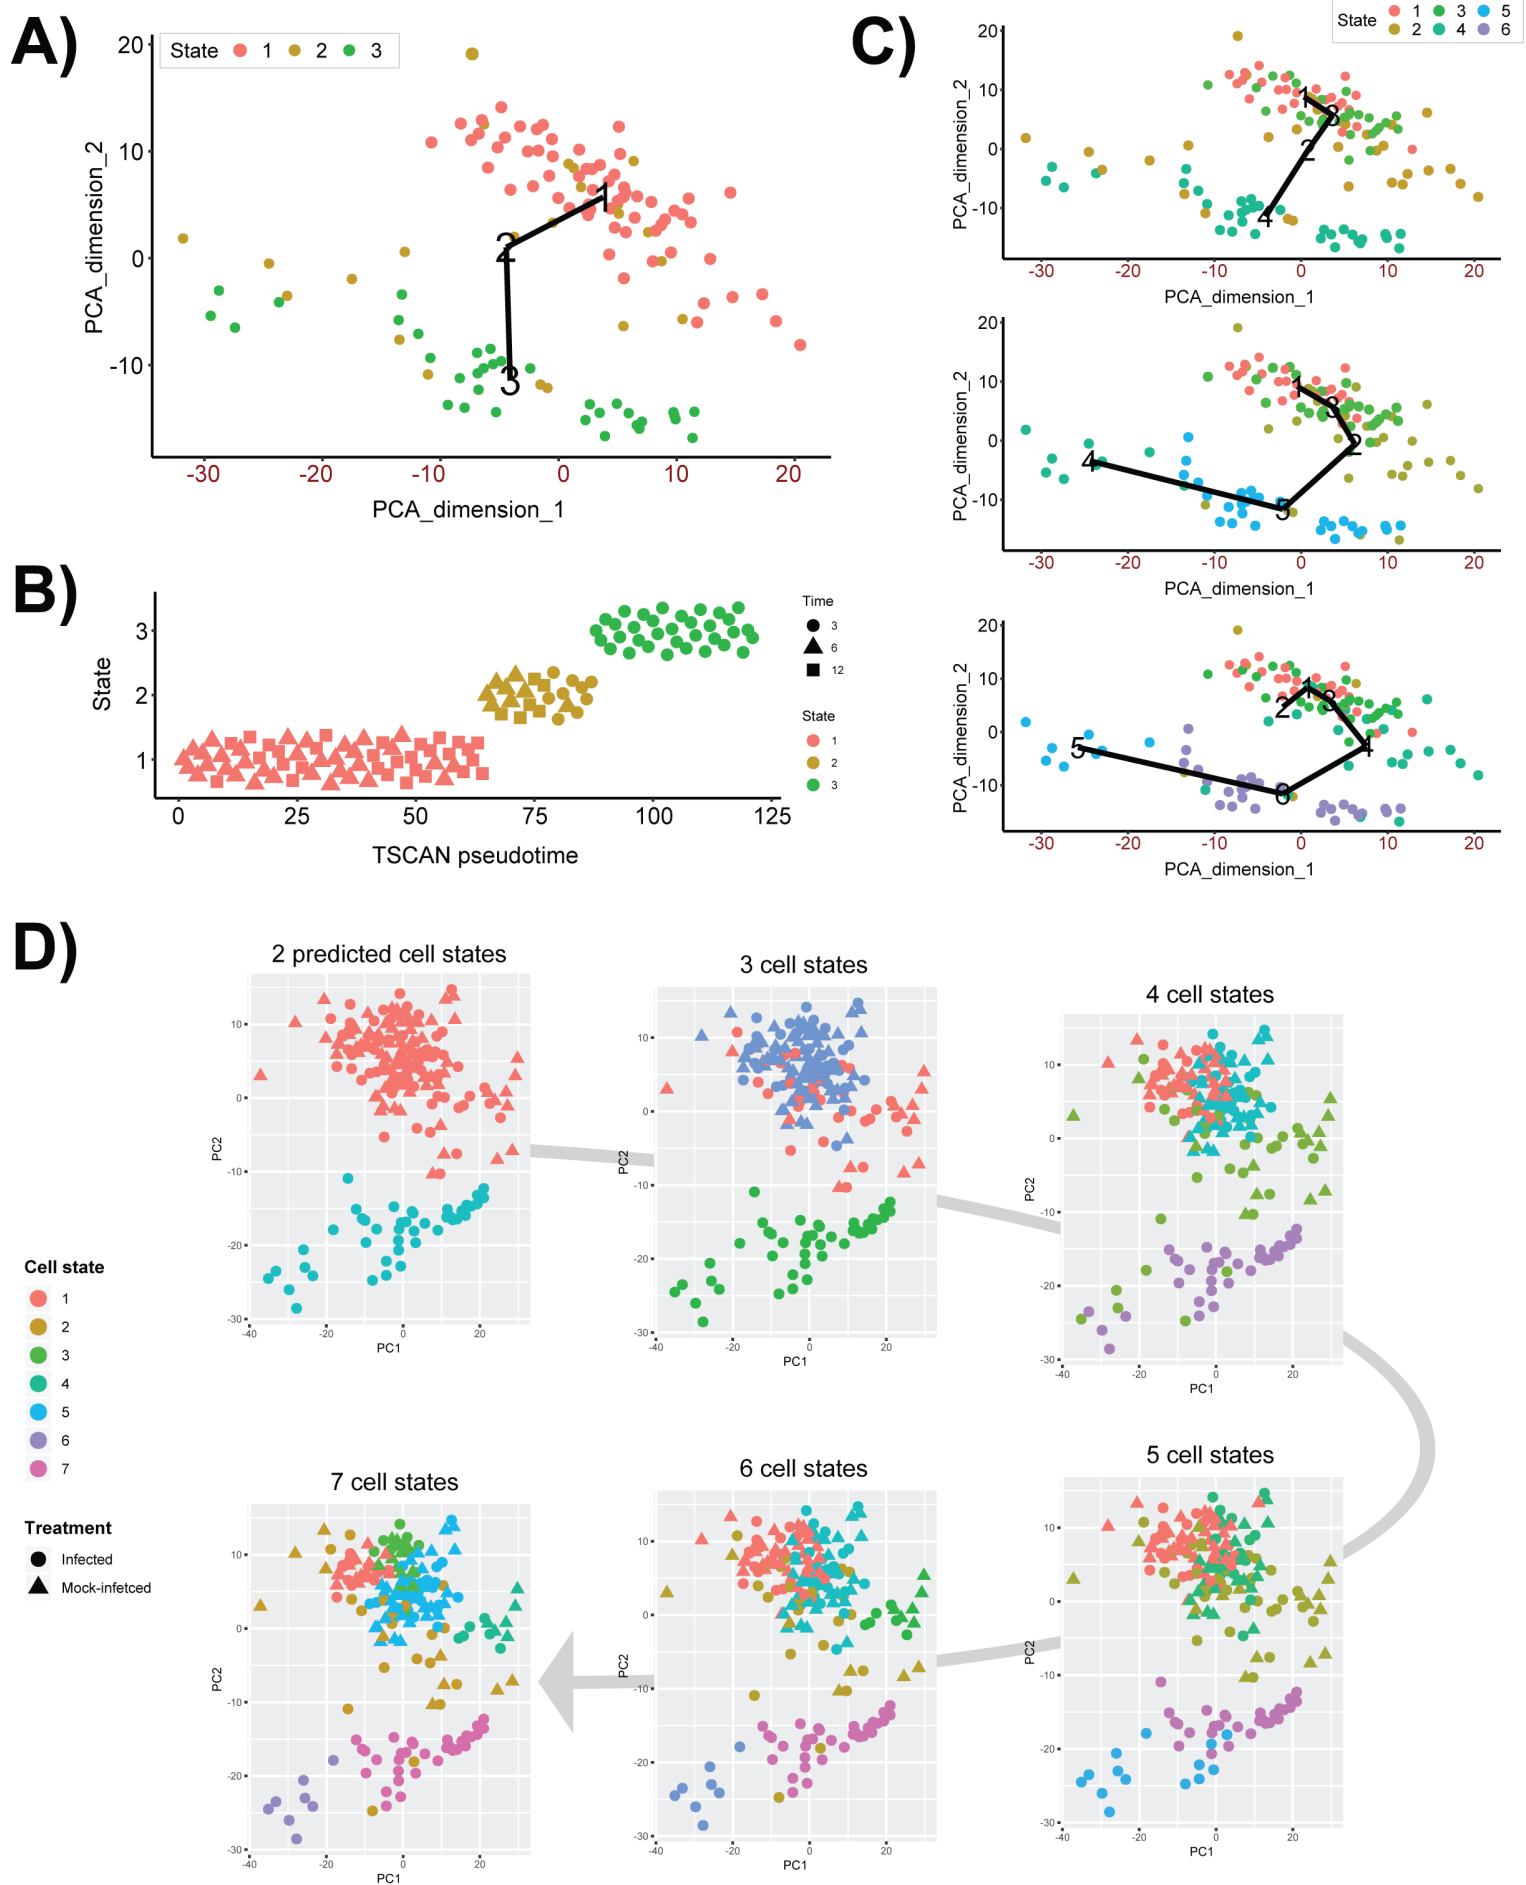

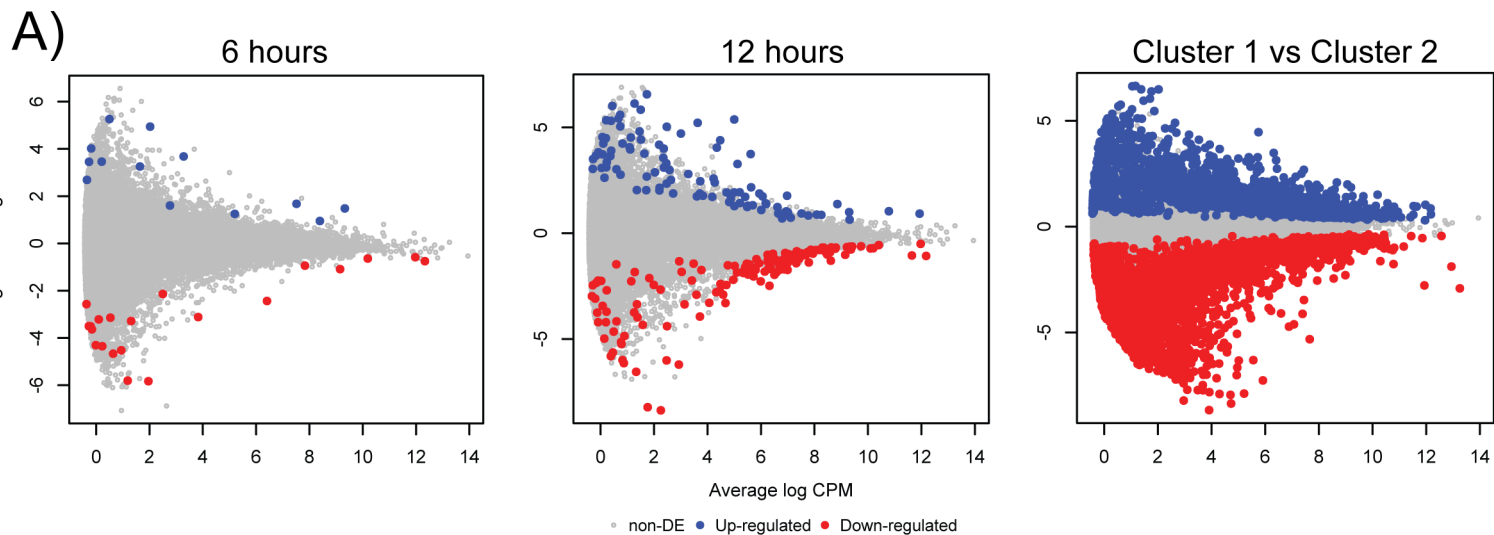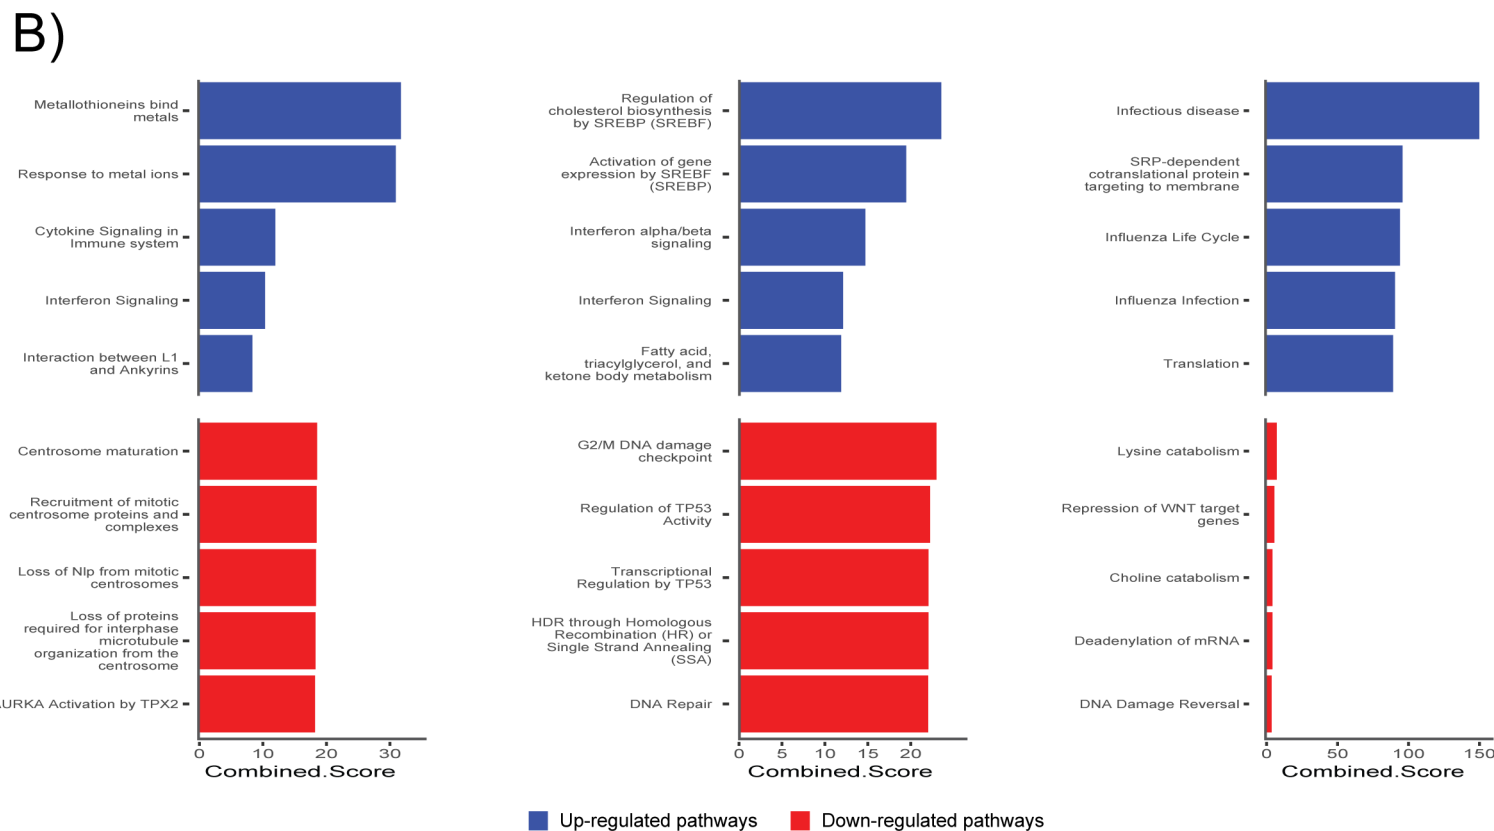

Supplement: Supplementary file [file media-1.pdf]
